## Research Article

# Lack of association between *miR-146a* rs2910164 C/G locus and colorectal cancer: from a case–control study to a meta-analysis

Jiakai Jiang<sup>1,\*</sup>, Sheng Zhang<sup>1,\*</sup>,  Weifeng Tang<sup>2</sup> and  Zhiyuan Qiu<sup>3</sup>

<sup>1</sup>Department of General Surgery, Changzhou No. 3 People's Hospital, Changzhou, Jiangsu Province, China; <sup>2</sup>Department of Cardiothoracic Surgery, Affiliated People's Hospital of Jiangsu University, Zhenjiang, Jiangsu Province, China; <sup>3</sup>Department of Medical Oncology, Affiliated People's Hospital of Jiangsu University, Zhenjiang, Jiangsu Province, China

**Correspondence:** Sheng Zhang (13601507172@163.com) or Zhiyuan Qiu (qzyjsu@sina.com)

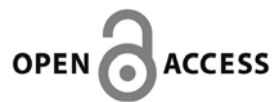

Previous studies suggested that *miR-146a* rs2910164 (C/G) locus was predicted to influence the risk of cancer. However, the relationship of *miR-146a* rs2910164 locus with colorectal cancer (CRC) susceptibility was controversial. We recruited 1003 CRC patients and 1303 controls, and performed a case–control study to clarify the correlation of *miR-146a* rs2910164 locus with CRC risk. Subsequently, a comprehensive meta-analysis was conducted to verify our findings. In the case–control study, we suggested that *miR-146a* rs2910164 variants did not alter CRC risk (CG vs. CC: adjusted  $P=0.465$ ; GG vs. CC: adjusted  $P=0.436$ , CG/GG vs. CC: adjusted  $P=0.387$  and GG vs. CC/CG: adjusted  $P=0.589$ ), even in subgroup analysis. Next, we conducted a pooled-analysis to identify the correlation of *miR-146a* rs2910164 locus with CRC risk. In this pooled-analysis, 7947 CRC cases and 12,168 controls were included. We found that *miR-146a* rs2910164 polymorphism did not influence the risk of CRC (G vs. C:  $P=0.537$ ; GG vs. CC:  $P=0.517$ , CG/GG vs. CC:  $P=0.520$  and GG vs. CC/CG:  $P=0.167$ ). Our findings suggest that *miR-146a* rs2910164 C/G polymorphism is not correlated with the susceptibility of CRC. In the future, more case–control studies are needed to confirm our results.

## Introduction

In 2018, it was reported that over 1.8 million new colorectal cancer (CRC) cases were diagnosed and 881,000 CRC-related deaths occurred worldwide [1]. In China, CRC ranked both fifth in terms of malignancy incidence and mortality [2]. Trend of cancer incidence indicated that a significant upward trend was found for CRC in developing countries [3]. Previous studies attributed CRC to aging, unhealthy lifestyle and environmental factors [4–7]. It should be very important to understand susceptibility factors of CRC as they could be beneficial for the evaluation of prevention strategies and susceptibility. Accumulating evidences have shown that an individual's inherited factors also contribute to the development of CRC.

*MicroRNA (miR-)* involves ~22 nucleotides. Recently, *miRs* have been widely investigated and accepted to be implicated in a number of human diseases, especially in malignancy. Adami *et al.* indicated that *miR-146a* was overexpressed in primary gastric tumor tissues without the status of chronic *Helicobacter pylori* infection and expressed a related lower level in progressed gastric cancer [8]. In addition, a recent study reported that *miR-146a* expression level decreased in progressed CRC patients with lymph node metastasis [9]. Thus, *miR-146a* was considered to be implicated in the development and progression of cancer [10,11].

In the past decade, several studies have focused on the correlation of *miR-146a* rs2910164 C/G with various malignancy susceptibility. *miR-146a* rs2910164 C/G locus was suggested to be relevant to an increase susceptibility of CRC in several studies [12,13]. However, two publications suggested that *miR-146a* rs2910164 G allele had a lower susceptibility of CRC compared to those with C allele [14,15]. Notably,

\*These authors contributed equally to this work.

Received: 13 June 2019  
Revised: 25 November 2020  
Accepted: 02 December 2020

Accepted Manuscript online:  
08 December 2020  
Version of Record published:  
04 January 2021

several pooled-analyses were performed regarding the relationship of CRC risk with this polymorphism [16–23]. However, the previous observations were diversity or even conflicting. Rong *et al.* and Liu *et al.* conducted meta-analyses and found that *miR-146a* rs2910164 polymorphism may confer risk to CRC [17,19]. Other meta-analyses reported that *miR-146a* rs2910164 was not related to CRC [16,18,20–23]. The controversial findings might be due to the limited sample sizes. The aim of the present study was to explore the potential correlation of *miR-146a* rs2910164 polymorphism with CRC risk more extensively. We first conducted a case–control study focusing on the correlation of *miR-146a* rs2910164 with the risk to CRC. Subsequently, we carried out a meta-analysis to further determine the relationship between *miR-146a* rs2910164 locus and CRC risk.

## Materials and methods

### Case–control study

We recruited 1003 sporadic CRC patients between October 2014 and August 2017. They were diagnosed via pathology in Fujian and Jiangsu provinces (China). The mean age of CRC patients was  $61.10 \pm 12.17$  years. In addition, 1303 healthy subjects with a mean age of  $61.40 \pm 9.61$  years were included as controls. The CRC cases and controls were matched by sex and age. The detailed information have been presented in our previous study [24–27]. After giving a written consent in the present study, all participants were questioned the information of risk factor and individual history. The Ethics Committee of Jiangsu University approved protocol of the present study.

Ethylenediamine tetraacetic acid-anticoagulated blood sample was stored in a  $-80^{\circ}\text{C}$  refrigerator. Genomic DNA was isolated from lymphocytes by using a DNA Kit (Promega, Madison, U.S.A.). *MiR-146a* rs2910164 variants were analyzed by a SNPscan Kit. To confirm the obtained results, 4% DNA samples were randomly selected and reciprocally tested by another person. The reproducibility of genotyping was 100%.

Genotype frequency of *miR-146a* rs2910164 variants and risk factors were compared by using  $\chi^2$  test. Crude and adjusted odds ratios (ORs) and 95% confidence intervals (95% CIs) were calculated to predict the association of the *miR-146a* rs2910164 variants with risk to CRC. A  $P < 0.05$  (two-tailed) was used to determine the significance. Hardy–Weinberg equilibrium (HWE) was used to confirm whether the distribution of *miR-146a* rs2910164 variants accorded with Mendelian inheritance patterns by a Chi-square software. All the comparisons were conducted using SAS 9.4 version software (SAS Institute, Cary, U.S.A.).

### Meta-analysis

To verify the correlation between *miR-146a* rs2910164 locus and the risk of CRC, we subsequently carried out a systematic review and meta-analysis. All studies focusing on the association of *miR-146a* rs2910164 polymorphism with CRC were identified by a widely internet-based search of China Biology Medicine (CBM), PubMed and Embase databases (published up to March 31, 2019) with the terms of: (miR-146a or hsa-mir-146a or miRNA-146a or MicroRNA-146a or rs2910164) and (colorectal or colon or rectum) and (polymorphism or SNP or variant) and (cancer or carcinoma). Other potential papers were obtained by searching of the references of in eligible publications.

The following included criteria were used: (a) studies based on the association between *miR-146a* rs2910164 and CRC risk; (b) genotype data were presented; and (c) the genotype distribution in controls consistent with HWE. Two authors (S. Zhang and J. Jiang) extracted the following information independently: the surname of first author, year of publication, country, ethnicity of participant, the region of CRC, method of genotyping and frequencies of *miR-146a* rs2910164 variants in cases and controls.

Crude ORs with their 95% CIs were harnessed to evaluate the strength of correlation between *miR-146a* rs2910164 and CRC risk. Chi-square-based Cochran's  $Q$ -test and  $I^2$  test were carried out to assess the heterogeneity among the eligible studies, which were defined as statistical significance if  $I^2 > 50\%$  or  $P < 0.1$ . The pooled ORs were calculated by a random-effect model (DerSimonian and Laird method), if we found significant heterogeneity [28,29]. Otherwise, the fixed effects model (the Mantel–Haenszel method) was used [30]. Sensitivity analysis was conducted by one-way method, which removed an individual study in turn to address the stability of our findings under all genetic models. In addition, Begg's test and Egger's test were used to assess the bias of publication. A  $P < 0.1$  was defined as the level for significance of publication bias. The Newcastle–Ottawa Scale (NOS) was used to assess the quality of the included studies. Galbraith radial plot was harnessed to identify the source of heterogeneity. All statistical tests were conducted by using the STATA software (Version 12.0; Stata Corporation, College Station, Texas). A  $P$  values (two-sided) less than 0.05 was defined as statistically significant association between *miR-146a* rs2910164 and CRC risk. By using Power and Sample Size Calculator software [31], power value ( $\alpha = 0.05$ ) of this meta-analysis was calculated.

**Table 1** Distribution of selected characteristics in CRC cases and controls

| Variable                         | Cases (n=1003) |       | Controls (n=1303) |       | P                  |
|----------------------------------|----------------|-------|-------------------|-------|--------------------|
|                                  | n              | %     | n                 | %     |                    |
| Age (years ± standard deviation) | 61.10 ± 12.17  |       | 61.40 ± 9.61      |       | 0.496*             |
| Age (years)                      |                |       |                   |       | 0.605†             |
| <61                              | 451            | 44.97 | 600               | 46.05 |                    |
| ≥61                              | 552            | 55.03 | 703               | 53.95 |                    |
| Sex                              |                |       |                   |       | 0.867†             |
| Male                             | 620            | 61.81 | 801               | 61.47 |                    |
| Female                           | 383            | 38.19 | 502               | 38.53 |                    |
| Smoking                          | 259            | 25.82 | 265               | 20.34 | <b>0.002</b> †     |
| Alcohol use                      | 174            | 17.35 | 136               | 10.44 | <b>&lt;0.001</b> † |
| BMI (kg/m <sup>2</sup> )         |                |       |                   |       | <b>&lt;0.001</b> † |
| <24                              | 670            | 66.80 | 688               | 52.80 |                    |
| ≥24                              | 333            | 33.20 | 615               | 47.20 |                    |
| Site of tumor                    |                |       |                   |       |                    |
| Colon cancer                     | 431            | 42.97 |                   |       |                    |
| Rectum cancer                    | 572            | 57.03 |                   |       |                    |

\*Two-sided student t test;

†Two-sided  $\chi^2$  test

Bold values are statistically significant ( $P < 0.05$ ).

BMI, body mass index

**Table 2** Primary information for MiR-146a rs2910164 C/G polymorphism

| Genotyped SNPs                        | MiR-146a rs2910164 C/G        |
|---------------------------------------|-------------------------------|
| Chromosome                            | 5                             |
| Function                              | non_coding_transcript_variant |
| Chr Pos (NCBI Build 38)               | 160485411                     |
| MAF* for Chinese in database†         | 0.430                         |
| MAF in our controls                   | 0.372                         |
| P value for HWE‡ test in our controls | 0.706                         |
| Genotyping method                     | SNPscan                       |
| % Genotyping value                    | 98.87%                        |

\*MAF: minor allele frequency

†<http://gvs.gs.washington.edu/GVS147/>

‡HWE, Hardy–Weinberg equilibrium

## Results

### Case–control study

This case–control study consisted of participants enrolled in a study conducted in Jiangsu and Fujian provinces (China) from October 2014 to August 2017. The detailed information of the present study was described in our previous studies [24,25]. Briefly, patients with 431 colon cancer and 572 rectum cancer were recruited. CRC cases were unrelated and confirmed histologically. Non-cancer subjects were included as controls from the same populations with age and sex matched. And all subjects were unrelated Chinese Han populations. Table 1 lists demographic information and risk factors that were collected in the present study. Table 2 summarizes the corresponding information of *miR-146a* rs2910164. The distribution of *miR-146a* rs2910164 variants in control group is consistent with HWE ( $P=0.706$ ). Data of genotypes and environmental factors are summarized in Supplementary Table S1.

Table 3 shows the genotype distribution of *miR-146a* rs2910164 in two groups. *MiR-146a* rs2910164 variant frequencies were 37.55% (CC), 47.96% (CG) and 14.49% (GG) in CRC patients and 39.69% (CC), 46.23% (CG) and 14.08% (GG) in controls. In the studied populations, minor allele frequency (MAF) of *miR-146a* rs2910164 C/G polymorphism was 0.372, which was similar to SNP database for Chinese populations (MAF = 0.430, Table 2). We found that there were no significant association between *miR-146a* rs2910164 polymorphism and susceptibility of

**Table 3** Logistic regression analyses of associations between MiR-146a rs2910164 C/G A polymorphism and risk of CRC

| Genotype           | Cases (n=1003) |       | Controls (n=1303) |       | Crude OR (95%CI) | P     | Adjusted OR* (95%CI) |       |
|--------------------|----------------|-------|-------------------|-------|------------------|-------|----------------------|-------|
|                    | n              | %     | n                 | %     |                  |       | P                    | P     |
| MiR-146a rs2910164 |                |       |                   |       |                  |       |                      |       |
| CC                 | 368            | 37.55 | 516               | 39.69 | 1.00             |       | 1.00                 |       |
| CG                 | 470            | 47.96 | 601               | 46.23 | 1.10 (0.92–1.31) | 0.317 | 1.07 (0.89–1.29)     | 0.465 |
| GG                 | 142            | 14.49 | 183               | 14.08 | 1.09 (0.84–1.41) | 0.520 | 1.11 (0.86–1.44)     | 0.436 |
| CG+GG              | 612            | 62.45 | 784               | 60.31 | 1.09 (0.92–1.30) | 0.300 | 1.08 (0.91–1.28)     | 0.387 |
| CC+CG              | 838            | 85.51 | 1,117             | 85.92 | 1.00             |       | 1.00                 |       |
| GG                 | 142            | 14.49 | 183               | 14.08 | 1.03 (0.82–1.31) | 0.780 | 1.07 (0.84–1.36)     | 0.589 |
| G allele           | 754            | 38.47 | 967               | 37.19 |                  |       |                      |       |

\*Adjusted for age, sex, BMI, alcohol use and smoking status.

CRC (CG vs. CC: crude  $P=0.317$ ; GG vs. CC: crude  $P=0.520$ , CG/GG vs. CC: crude  $P=0.300$ ; GG vs. CC/CG: crude  $P=0.780$ ). Adjustments for selected risk factors (e.g. age, sex, BMI, smoking and drinking), the null association was also found (CG vs. CC: adjusted  $P=0.465$ ; GG vs. CC: adjusted  $P=0.436$ , CG/GG vs. CC: adjusted  $P=0.387$  and GG vs. CC/CG: adjusted  $P=0.589$ ; Table 3).

In subgroup analysis, we found that *miR-146a* rs2910164 variants did not alter the susceptibility of colon cancer (CG vs. CC: adjusted  $P=0.863$ ; GG vs. CC: adjusted  $P=0.880$ , CG/GG vs. CC: adjusted  $P=0.846$  and GG vs. CC/CG: adjusted  $P=0.926$ ; Table 4) or rectal cancer (CG vs. CC: adjusted  $P=0.420$ ; GG vs. CC: adjusted  $P=0.337$ , CG/GG vs. CC: adjusted  $P=0.324$  and GG vs. CC/CG: adjusted  $P=0.484$ ; Table 4).

### Meta-analysis of MiR-146a rs2910164 locus and CRC

Next, we conducted a pooled-analysis to identify the correlation of *miR-146a* rs2910164 with CRC risk. At first, 96 abstracts were collected by searching CBM, EMBASE and Pubmed databases. Figure 1 summarizes the process of meta-analysis. Some publications contained stratified analysis, we treated these subgroups separately [14,32–34]. Table 5 shows the characteristics and *miR-146a* rs2910164 genotypes of included case-control studies. Finally, 7947 CRC cases and 12,168 controls were included to analyze the relationship of *miR-146a* rs2910164 with CRC risk [12–15,32–41].

We found that there was no significant association between *miR-146a* rs2910164 polymorphism and the risk of CRC (G vs. C:  $P=0.537$ ; GG vs. CC:  $P=0.517$ , CG/GG vs. CC:  $P=0.520$  and GG vs. CC/CG:  $P=0.167$ ; Table 6 and Figure 2). Additionally, subgroup analyses were performed by the ethnicity and region of CRC. Null association between *miR-146a* rs2910164 and the susceptibility of CRC was also found (Table 6).

In this analysis, publication bias was assessed by using Begg's test and Egger's linear regression test. And no significant bias was found in any genetic model (Begg's test: G vs. C:  $P=0.820$ ; GG vs. CC:  $P=0.649$ ; GG/CG vs. CC:  $P=0.649$ ; GG vs. CC/CG:  $P=0.381$ ; Egger's linear regression test: G vs. C:  $P=0.980$ ; GG vs. CC:  $P=0.761$ ; GG/CG vs. CC:  $P=0.686$ ; GG vs. CC/CG:  $P=0.215$ ; Figure 3).

We used one-way method to evaluate the sensitivity of this analysis. The results suggested that any individual study could not materially alter the association between *miR-146a* rs2910164 and CRC risk (Figure 4).

Since significant heterogeneity among the studies was found, we conducted subgroup analyses and Galbraith radial plot to identify the source of heterogeneity in a dominant model. Because ethnicity and type of CRC could affect the observations of meta-analysis, subgroup analyses were carried out (Table 6). We found that rectal cancer and Asians might lead to major source of heterogeneity. In Galbraith radial plot, we could find five outliers [12,13,35–37], which contributed significant heterogeneity to this analysis (Figure 5).

NOS scores of the included studies were summarized in Table 5. According to the criterion mentioned in previous study [42,43], we found that only two investigations were poor quality studies [36,44]. When we omitted these poor quality investigations, the findings were not changed.

For this pooled-analysis, the power value ( $\alpha = 0.05$ ) was 0.258 in G vs. C, 0.235 in GG vs. CC, 0.275 in GG/CG vs. CC and 0.579 in GG vs. CC/CG genetic model.

**Table 4** Stratified analyses between MiR-146a rs2910164 polymorphism and CRC risk by site of tumor

| Genotype           | Controls (n=1303) |       | Colon cancer cases (n=431) |       | Crude OR (95%CI) | P     | Adjusted OR* (95%CI) |       | P * | Rectum cancer cases (n=572) |       | Crude OR (95%CI) | P     | Adjusted OR* (95%CI) |       | P * |
|--------------------|-------------------|-------|----------------------------|-------|------------------|-------|----------------------|-------|-----|-----------------------------|-------|------------------|-------|----------------------|-------|-----|
|                    | n                 | %     | n                          | %     |                  |       | n                    | %     |     | n                           | %     |                  |       |                      |       |     |
| MiR-146a rs2910164 |                   |       |                            |       |                  |       |                      |       |     |                             |       |                  |       |                      |       |     |
| CC                 | 516               | 39.69 | 165                        | 39.01 | 1.00             |       | 1.00                 |       |     | 203                         | 36.45 | 1.00             |       | 1.00                 |       |     |
| CG                 | 601               | 46.23 | 200                        | 47.28 | 1.04 (0.82–1.32) | 0.742 | 1.02 (0.80–1.30)     | 0.863 |     | 270                         | 48.47 | 1.14 (0.92–1.42) | 0.230 | 1.10 (0.88–1.37)     | 0.420 |     |
| GG                 | 183               | 14.08 | 58                         | 13.71 | 0.99 (0.70–1.40) | 0.960 | 1.03 (0.73–1.45)     | 0.880 |     | 84                          | 15.08 | 1.17 (0.86–1.58) | 0.322 | 1.17 (0.85–1.59)     | 0.337 |     |
| CG+GG              | 784               | 60.31 | 258                        | 60.99 | 1.03 (0.82–1.29) | 0.803 | 1.02 (0.82–1.28)     | 0.846 |     | 354                         | 63.55 | 1.15 (0.94–1.41) | 0.188 | 1.11 (0.90–1.37)     | 0.324 |     |
| CC+CG              | 1117              | 85.92 | 365                        | 86.29 | 1.00             |       | 1.00                 |       |     | 473                         | 84.92 | 1.00             |       | 1.00                 |       |     |
| GG                 | 183               | 14.08 | 58                         | 13.71 | 0.97 (0.71–1.33) | 0.852 | 1.02 (0.74–1.40)     | 0.926 |     | 84                          | 15.08 | 1.08 (0.82–1.43) | 0.572 | 1.11 (0.83–1.47)     | 0.484 |     |
| G allele           | 967               | 37.19 | 316                        | 37.35 |                  |       |                      |       |     | 438                         | 39.32 |                  |       |                      |       |     |

\*Adjusted for age, sex, smoking status, alcohol use and BMI status.

**Table 5 Characteristics and genotypes of the included studies in meta-analysis for MiR-146a rs2910164 polymorphism**

| Study             | Publication year | Ethnicity  | Country                      | Region of CRC | Sample size (case/control) | Genotype method | Case    |              |        | Control |            |       | HWE | NOS |
|-------------------|------------------|------------|------------------------------|---------------|----------------------------|-----------------|---------|--------------|--------|---------|------------|-------|-----|-----|
|                   |                  |            |                              |               |                            |                 | GG      | CG           | CC     | GG      | CG         | CC    |     |     |
| Hezova et al.     | 2012             | Caucasians | Czech Republic               | Mixed         | 197/122                    | Taqman          | 115     | 70           | 12     | 124     | 79         | 9     | Yes | 7   |
| Min et al.        | 2012             | Asians     | Korea                        | Colon         | 251/502                    | PCR-RFLP        | 31      | 144          | 76     | 69      | 245        | 188   | Yes | 7   |
| Min et al.        | 2012             | Asians     | Korea                        | Rectum        | 184/502                    | PCR-RFLP        | 28      | 87           | 69     | 69      | 245        | 188   | Yes | 7   |
| Chae et al.       | 2013             | Asians     | Korea                        | Rectum        | 176/568                    | PCR-RFLP        | 23      | 87           | 66     | 121     | 282        | 165   | Yes | 7   |
| Chae et al.       | 2013             | Asians     | Korea                        | Colon         | 221/568                    | PCR-RFLP        | 38      | 93           | 90     | 121     | 282        | 165   | Yes | 7   |
| Lv et al.         | 2013             | Asians     | China                        | Mixed         | 353/540                    | PCR-RFLP        | 54      | 230          | 47     | 96      | 274        | 143   | Yes | 7   |
| Ma et al.         | 2013             | Asians     | China                        | Rectum        | 588/1,203                  | Taqman          | 229     | CG/CC : 359* | –      | 397     | CG/CC 806* | –     | Yes | 7   |
| Ma et al.         | 2013             | Asians     | China                        | Colon         | 559/1,203                  | Taqman          | 215     | CG/CC : 344* | –      | 397     | CG/CC 806* | –     | Yes | 7   |
| Vinci et al.      | 2013             | Caucasians | Italy                        | Mixed         | 160/160                    | HRM             | 86      | 57           | 17     | 100     | 65         | 13    | Yes | 5   |
| Kupcinskas et al. | 2014             | Caucasians | Lithuania and Latvia         | Mixed         | 193/428                    | Taqman          | 140     | 50           | 2      | 275     | 134        | 15    | Yes | 7   |
| Mao et al.        | 2014             | Asians     | China                        | Mixed         | 554/566                    | SNPscan         | 70      | 291          | 186    | 85      | 271        | 205   | Yes | 9   |
| Hu et al.         | 2014             | Asians     | China                        | Mixed         | 276/373                    | PCR-RFLP        | 34      | 82           | 84     | 44      | 187        | 142   | Yes | 7   |
| Dikaiakos et al.  | 2015             | Caucasians | Greece                       | Mixed         | 157/299                    | PCR-RFLP        | 8       | 48           | 101    | 21      | 120        | 158   | Yes | 7   |
| Yíng et al.       | 2016             | Asians     | China                        | Mixed         | 1358/1079                  | MassARRAY       | 223     | 655          | 473    | 163     | 529        | 383   | Yes | 6   |
| Zhang et al.      | 2016             | Asians     | China                        | Mixed         | 106/53                     | PCR-RFLP        | 28      | 62           | 16     | 10      | 25         | 18    | Yes | 6   |
| Lindor et al.     | 2017             | Caucasians | Australia, U.S.A. and Canada | Mixed         | 899/204                    | Not available   | G: 1390 |              | C: 408 | G: 320  |            | C: 88 | Yes | 5   |
| Chayeb et al.     | 2018             | Caucasians | Tunisia                      | Rectum        | 57/161                     | PCR-RFLP        | 20      | 31           | 6      | 49      | 89         | 23    | Yes | 8   |
| Chayeb et al.     | 2018             | Caucasians | Tunisia                      | Colon         | 95/161                     | PCR-RFLP        | 40      | 46           | 9      | 49      | 89         | 23    | Yes | 8   |
| Gao et al.        | 2018             | Asians     | China                        | Mixed         | 560/780                    | PCR-RFLP        | 130     | 285          | 145    | 149     | 411        | 220   | Yes | 7   |
| Our study         | 2019             | Asians     | China                        | Colon         | 431/1303                   | SNPscan         | 58      | 200          | 165    | 183     | 601        | 516   | Yes | 6   |
| Our study         | 2019             | Asians     | China                        | Rectum        | 572/1303                   | SNPscan         | 84      | 270          | 203    | 183     | 601        | 516   | Yes | 6   |

\*indicates CG/CC HWE, Hardy–Weinberg equilibrium

**Table 6 Meta-analysis of the MiR-146a rs2910164 polymorphism and CRC risk**

|                   | No. of study | G vs. C          |       |            | GG vs. CC        |       |            | GG+CG vs. CC     |       |            | GG vs. CC+CG     |       |            |
|-------------------|--------------|------------------|-------|------------|------------------|-------|------------|------------------|-------|------------|------------------|-------|------------|
|                   |              | OR (95%CI)       | P     | P (Q-test) | OR (95%CI)       | P     | P (Q-test) | OR (95%CI)       | P     | P (Q-test) | OR (95%CI)       | P     | P (Q-test) |
|                   |              |                  |       |            |                  |       |            |                  |       |            |                  |       |            |
| Overall           | 21           | 1.03 (0.94–1.12) | 0.537 | <0.001     | 1.06 (0.89–1.27) | 0.517 | 0.002      | 1.05 (0.90–1.24) | 0.520 | <0.001     | 1.08 (0.97–1.20) | 0.167 | 0.033      |
| Type              |              |                  |       |            |                  |       |            |                  |       |            |                  |       |            |
| Colon cancer      | 5            | 1.01 (0.80–1.28) | 0.908 | 0.006      | 0.98 (0.65–1.48) | 0.914 | 0.040      | 1.02 (0.69–1.51) | 0.926 | 0.002      | 1.07 (0.84–1.35) | 0.600 | 0.069      |
| Rectal cancer     | 5            | 0.98 (0.78–1.22) | 0.823 | 0.021      | 0.95 (0.59–1.51) | 0.815 | 0.024      | 0.97 (0.74–1.28) | 0.853 | 0.083      | 1.05 (0.80–1.36) | 0.741 | 0.037      |
| Mixed type of CRC | 11           | 1.06 (0.95–1.17) | 0.294 | 0.021      | 1.17 (0.92–1.48) | 0.192 | 0.044      | 1.12 (0.87–1.44) | 0.373 | <0.001     | 1.09 (0.97–1.22) | 0.132 | 0.176      |
| Ethnicity         |              |                  |       |            |                  |       |            |                  |       |            |                  |       |            |
| Asians            | 14           | 1.03 (0.94–1.13) | 0.547 | 0.002      | 1.06 (0.88–1.29) | 0.530 | 0.003      | 1.09 (0.92–1.29) | 0.343 | <0.001     | 1.06 (0.93–1.19) | 0.393 | 0.023      |
| Caucasians        | 7            | 1.03 (0.84–1.26) | 0.796 | 0.020      | 1.09 (0.63–1.87) | 0.760 | 0.083      | 0.95 (0.60–1.50) | 0.835 | 0.080      | 1.16 (0.96–1.41) | 0.129 | 0.268      |
| NOS scores        |              |                  |       |            |                  |       |            |                  |       |            |                  |       |            |
| ≥6                | 19           | 1.04 (0.95–1.14) | 0.396 | <0.001     | 1.08 (0.90–1.30) | 0.405 | 0.002      | 1.07 (0.91–1.26) | 0.419 | <0.001     | 1.09 (0.97–1.21) | 0.142 | 0.030      |
| < 6               | 2            | 0.91 (0.74–1.12) | 0.368 | 0.712      | 0.66 (0.30–1.43) | 0.291 | –          | 0.66 (0.31–1.41) | 0.286 | –          | 0.91 (0.59–1.39) | 0.654 | –          |

CRC, colorectal cancer;

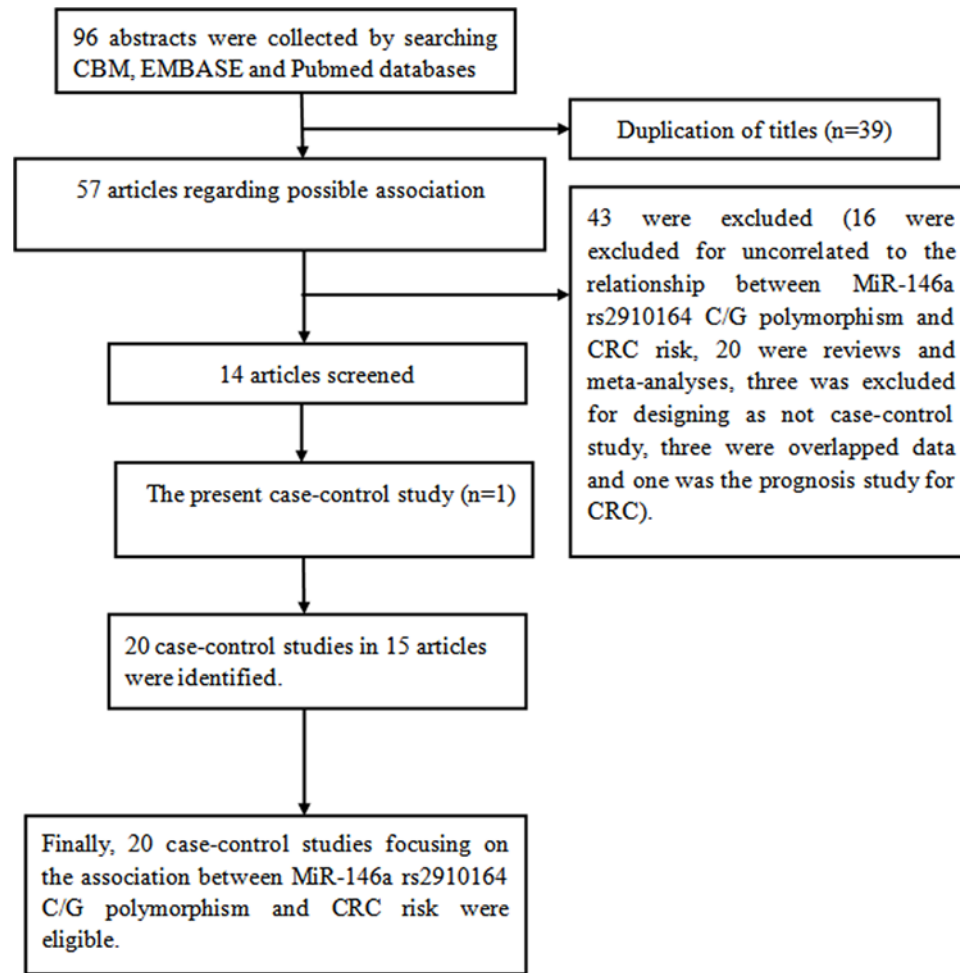

**Figure 1.** Flow diagram of the meta-analysis of the association between *MiR-146a* rs2910164 polymorphism and CRC risk

## Discussion

In CRC patients, *miR-146a* expression level decreased in progressed tumors [9]. Since *miR-146a* plays important roles in the development of CRC, we presumed that *miR-146a* rs2910164 variants could influence the susceptibility to CRC. Here, we first performed a case-control study and subsequently conducted a meta-analysis on the potential correlation between *miR-146a* rs2910164 polymorphism and the susceptibility of CRC. In the case-control study, we recruited 1003 sporadic CRC patients and 1303 controls. In meta-analysis, the present study included 21 independent studies with 20,115 subjects (7947 CRC patients and 12,168 controls). Nevertheless, null correlation has been identified between *miR-146a* rs2910164 locus and the risk of CRC, even in different subgroup.

To date, some studies have been carried out to assess this potential correlation between *miR-146a* rs2910164 polymorphism and CRC susceptibility in different populations. However, conflicting findings were found. Consequently, we designed a case-control study matching with age and sex. We got a null correlation between this SNP and the risk of CRC. These findings were similar to some previous publications, which the genotype frequency of the *miR-146a* rs2910164 G allele had no significant difference in CRC cases versus non-cancer controls [35,36,39,40]. It was worth mentioning that the paper was published by Ying *et al.* [40], where the investigation included more than 1000 CRC patients and 1000 controls. However, other publications, identified a significant associations or even suggested opposite findings. Dikaiakos *et al.* [15] and Chae *et al.* [14] reported a decreased risk of the *miR-146a* rs2910164 G allele to CRC. Recently, two publications found an association of the increased risk with *miR-146a* rs2910164 G allele [12,13]. It could be interpreted that these investigations were carried out in different ethnicity, region, age and with variable sample size. A recent meta-analysis has found an association for the European populations in the recessive model



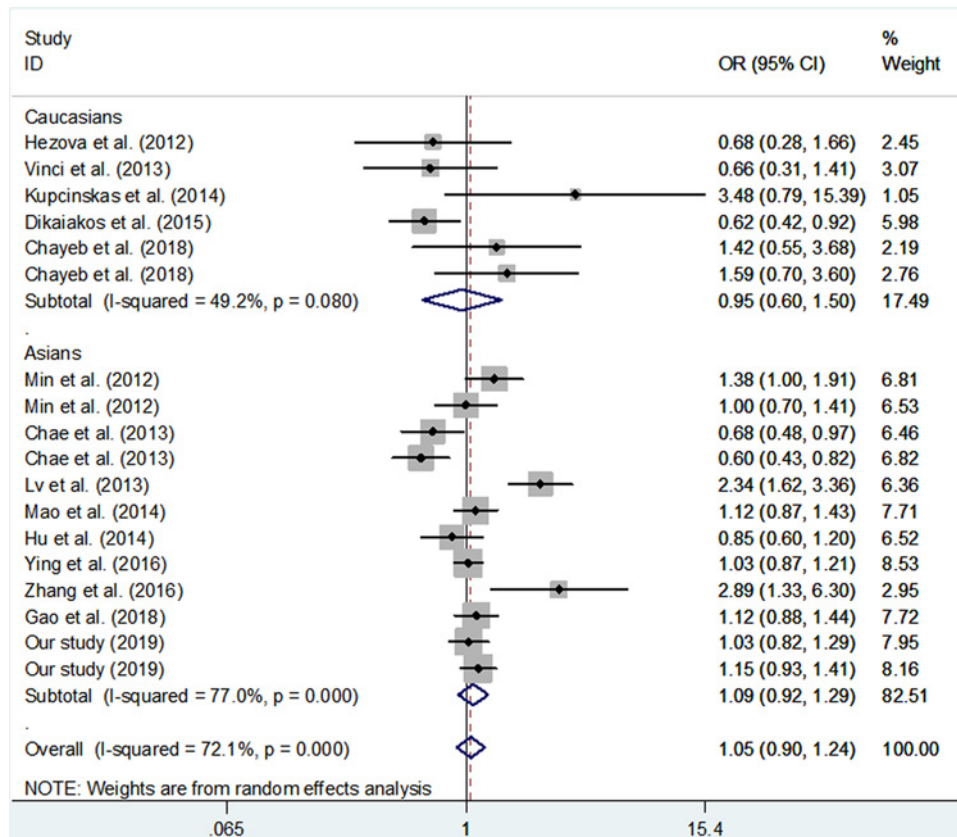

**Figure 2.** Meta-analysis of the association between *MiR-146a* rs2910164 polymorphism and CRC risk (GG+CG vs. CC, random-effects model)

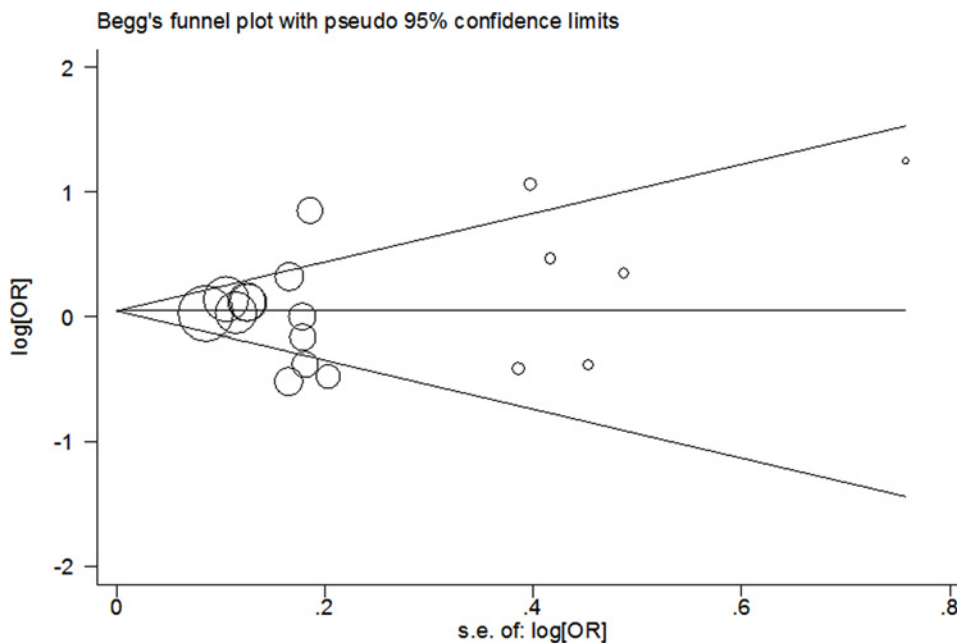

**Figure 3.** Begg's funnel plot of meta-analysis (GG+CG vs. CC, random-effects model)

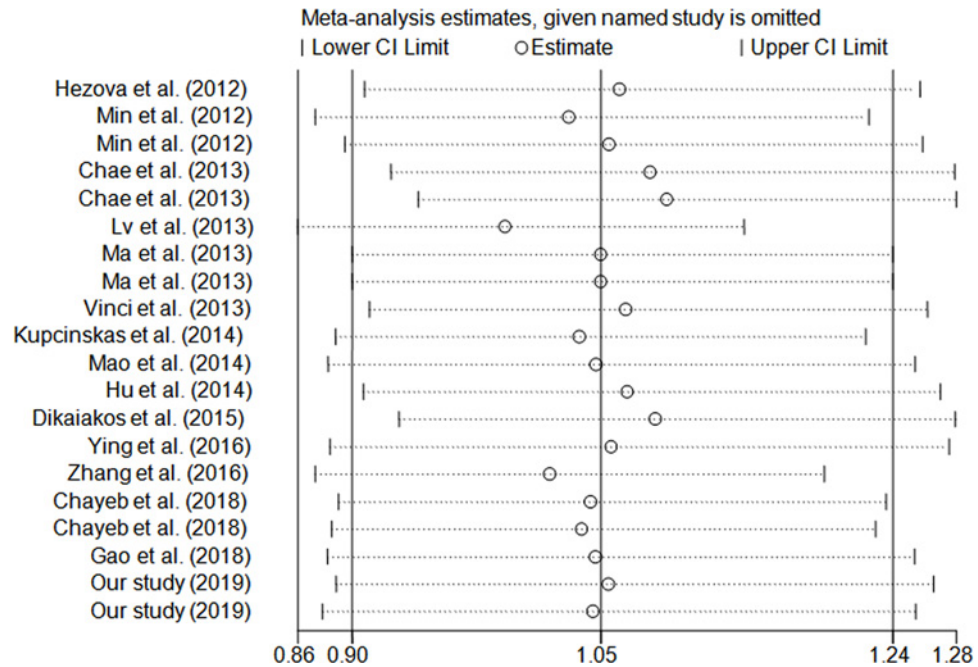

Figure 4. Sensitivity analysis in dominant model (random-effects estimates)

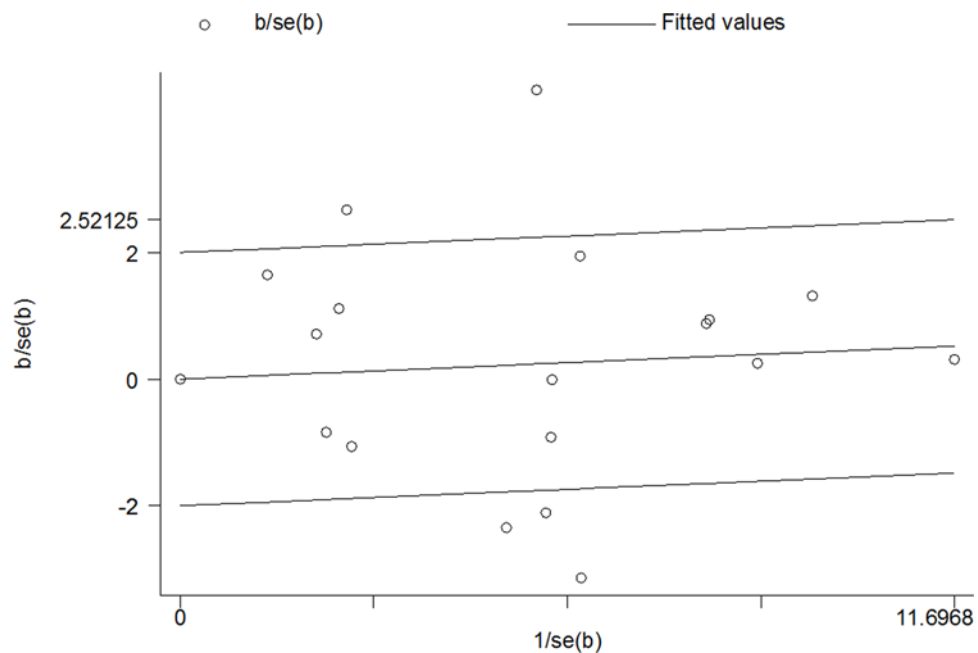

Figure 5. Galbraith radial plot of meta-analysis (GG+CG vs. CC, random-effects model)

[45]. Compared with the meta-analysis mentioned above, the current meta-analysis has included more case-control studies with larger sample sizes. Thus, our findings might be more credible.

In the large-scale pooled-analysis, we found that *miR-146a* rs2910164 might not confer the risk to CRC. However, the interaction between genes and environment factors might be implicated in the occurrence of CRC. Reviewing early publications, some reasons were identified for the conflicting findings. First, different ethnicity may lead to the different results, since the genotype frequencies of the *miR-146a* rs2910164 were diverse between Asians and Caucasians. For example, in the present study, MAF value of *miR-146a* rs2910164 (C/G) was 0.404 in Asians, while the value was 0.631 in Caucasians. On the other hand, most of the included case-control studies did not focus on

some vital environmental risk factors (e.g., low intake of dietary fiber, alcohol consumption, tobacco use, obesity, overweight and being physically inactive). It is possible that *miR-146a* rs2910164 has influence the development of CRC, while those environmental factors mentioned above may cover up the role of C→G variation in rs2910164. Thus, in the future, more case–control studies should be designed to explore the relationship of *miR-146a* rs2910164 on the risk of CRC, especially focusing on the interaction of gene–environmental factors.

In the present study, heterogeneity might be noted, which could significantly affect the explanation of our findings. When we carried out subgroup analyses, significant heterogeneity was found in colon cancer and Asians subgroups. Combined the Galbraith radial plot (Figure 5) and the forest plot (Figure 2) in a dominant model, we identified five outliers [12,13,35–37], which might contribute to prominent heterogeneity. The quality evaluation was used to improve the present study. In the meta-analysis, we found that only two investigations were poor quality study [36,44]. In subgroup analysis, when we omitted them, the findings were not altered materially.

There are, whereas, some potential limitations in the present study. First, this case–control study only focused on Chinese Han populations. Second, for lack of parameter of risk factors, we only calculate the crude ORs and CIs to assess the correlation between *miR-146a* rs2910164 and CRC risk in subsequent meta-analysis. Finally, due to the limited participants in subgroups, the power of subgroup analysis might be insufficient.

To conclude, our findings have not supported a relationship between the *miR-146a* rs2910164 and risk of CRC. The importance of this locus as a genetic predictor for the development of CRC may be very inappreciable and the significance of hereditary screening in healthy individuals may be lack of evidence. In the future, larger studies with well-matched controls are needed to confirm our findings.

## Data Availability

The genotypes and environmental factors are summarized in Supplementary Table S1.

## Competing Interests

The authors declare that there are no competing interests associated with the manuscript.

## Funding

The project was supported by the Application and Basic Research Project of Changzhou City [grant number CJ20180068].

## Author Contribution

Conceived and designed the experiments: Z.Q. Performed the experiments: S.Z., J.J., W.T. Analyzed the data: J.J., W.T. Contributed reagents/materials/analysis tools: Z.Q. Wrote the manuscript: S.Z., J.J.

## Acknowledgements

We appreciate all subjects who participated in this study. We wish to thank Dr Yan Liu (Genesky Biotechnologies Inc., Shanghai, China) for technical support.

## Abbreviations

CI, confidence interval; CRC, colorectal cancer; HWE, Hardy–Weinberg equilibrium; OR, odds ratio.

## References

- 1 Bray, F., Ferlay, J., Soerjomataram, I. et al. (2018) Global cancer statistics 2018: GLOBOCAN estimates of incidence and mortality worldwide for 36 cancers in 185 countries. *CA Cancer J. Clin.* **68**, 394–424, <https://doi.org/10.3322/caac.21492>
- 2 Chen, W., Zheng, R., Baade, P.D. et al. (2016) Cancer statistics in China, 2015. *CA Cancer J. Clin.* **66**, 115–132, <https://doi.org/10.3322/caac.21338>
- 3 Bode, A.M., Dong, Z. and Wang, H. (2016) Cancer prevention and control: alarming challenges in China. *Natl. Sci. Rev.* **3**, 117–127, PMC4904843, <https://doi.org/10.1093/nsr/nwv054>
- 4 Jemal, A., Bray, F., Center, M.M. et al. (2011) Global cancer statistics. *CA Cancer J. Clin.* **61**, 69–90, <https://doi.org/10.3322/caac.20107>
- 5 Mathers, J.C. (2019) Obesity and bowel cancer: from molecular mechanisms to interventions. *Nutr. Res.* **70**, 26–31, <https://doi.org/10.1016/j.nutres.2018.08.004>
- 6 Niederreiter, L., Adolph, T.E. and Tilg, H. (2018) Food, microbiome and colorectal cancer. *Digestive Liver Dis.: Off. J. Italian Soc. Gastroenterol. Italian Assoc. Study of the Liver* **50**, 647–652, <https://doi.org/10.1016/j.dld.2018.03.030>
- 7 Rossi, M., Jahanzaib Anwar, M., Usman, A. et al. (2018) Colorectal Cancer and Alcohol Consumption–Populations to Molecules. *Cancers* **10**, 38, PMC5836070, <https://doi.org/10.3390/cancers10020038>
- 8 Adami, B., Tabatabaieian, H., Ghaedi, K. et al. (2019) miR-146a is deregulated in gastric cancer. *J. Cancer Res. Therap.* **15**, 108–114

- 9 Liu, Z., Li, Y. and Luo, Q. (2018) Relationship between CT signs and the expression of miR-146a in colon cancer. *Oncol. Lett.* **16**, 6598–6602, PMC6176405, <https://doi.org/10.3892/ol.2018.9415>
- 10 Testa, U., Pelosi, E., Castelli, G. et al. (2017) miR-146 and miR-155: Two Key Modulators of Immune Response and Tumor Development. *Non-coding RNA* **3**, 22, PMC5831915, <https://doi.org/10.3390/ncrna3030022>
- 11 Labbaye, C. and Testa, U. (2012) The emerging role of MIR-146A in the control of hematopoiesis, immune function and cancer. *J. Hematol. Oncol.* **5**, 13, PMC3342163, <https://doi.org/10.1186/1756-8722-5-13>
- 12 Lv, M., Dong, W., Li, L. et al. (2013) Association between genetic variants in pre-miRNA and colorectal cancer risk in a Chinese population. *J. Cancer Res. Clin. Oncol.* **139**, 1405–1410, <https://doi.org/10.1007/s00432-013-1456-7>
- 13 Zhang, H., Cui, S., Lin, Y., Yang, Y., Lai, W., Lup, S. et al. (2016) Correlation between polymorphism of single nucleotide gene rs2910164 in miR-146a and incidence and metastasis of colorectal cancer. *J. Shanghai Jiaotong Univ. (Chin. Ed.)* **36**, 809–813
- 14 Chae, Y.S., Kim, J.G., Lee, S.J. et al. (2013) A miR-146a polymorphism (rs2910164) predicts risk of and survival from colorectal cancer. *Anticancer Res.* **33**, 3233–3239
- 15 Dikaiakos, P., Gazouli, M., Rizos, S. et al. (2015) Evaluation of genetic variants in miRNAs in patients with colorectal cancer. *Cancer Biomarkers: Section A Dis. Markers* **15**, 157–162, <https://doi.org/10.3233/CBM-140449>
- 16 Alidoust, M., Hamzehzadeh, L., Rivandi, M. et al. (2018) Polymorphisms in non-coding RNAs and risk of colorectal cancer: A systematic review and meta-analysis. *Crit. Rev. Oncol. Hematol.* **132**, 100–110, <https://doi.org/10.1016/j.critrevonc.2018.09.003>
- 17 Rong, G.Q., Zhang, X.M., Chen, B. et al. (2017) MicroRNA gene polymorphisms and the risk of colorectal cancer. *Oncol. Lett.* **13**, 3617–3623, PMC5431414, <https://doi.org/10.3892/ol.2017.5885>
- 18 Xu, L. and Tang, W. (2016) Associations of Polymorphisms in mir-196a2, mir-146a and mir-149 with Colorectal Cancer Risk: A Meta-Analysis. *Pathol. Oncol. Res.: POR* **22**, 261–267, <https://doi.org/10.1007/s12253-014-9843-1>
- 19 Liu, X.X., Wang, M., Xu, D. et al. (2015) Quantitative Assessment of the Association between Genetic Variants in MicroRNAs and Colorectal Cancer Risk. *BioMed. Res. Int.* **2015**, 276410, PMC4452836, <https://doi.org/10.1155/2015/276410>
- 20 Xie, W.Q., Tan, S.Y. and Wang, X.F. (2014) Effect of a common genetic variant microRNA-146a rs2910164 on colorectal cancer: a meta-analysis. *J. Digestive Dis.* **15**, 647–653, <https://doi.org/10.1111/1751-2980.12201>
- 21 Wu, Y., Hao, X., Feng, Z. et al. (2015) Genetic polymorphisms in miRNAs and susceptibility to colorectal cancer. *Cell Biochem. Biophys.* **71**, 271–278, <https://doi.org/10.1007/s12013-014-0195-y>
- 22 Du, W., Ma, X.L., Zhao, C. et al. (2014) Associations of single nucleotide polymorphisms in miR-146a, miR-196a, miR-149 and miR-499 with colorectal cancer susceptibility. *Asian Pacific J. Cancer Prevent.: APJCP* **15**, 1047–1055, <https://doi.org/10.7314/APJCP.2014.15.2.1047>
- 23 Wan, D., Gu, W., Xu, G. et al. (2014) Effects of common polymorphisms rs2910164 in miR-146a and rs11614913 in miR-196a2 on susceptibility to colorectal cancer: a systematic review meta-analysis. *Clin. Transl. Oncol.: Off. Publication Feder. Spanish Oncol. Societies Natl. Cancer Institute Mexico* **16**, 792–800, <https://doi.org/10.1007/s12094-013-1150-x>
- 24 Zou, C., Qiu, H., Tang, W. et al. (2018) CTLA4 tagging polymorphisms and risk of colorectal cancer: a case-control study involving 2,306 subjects. *OncoTargets Ther.* **11**, 4609–4619, PMC6086103, <https://doi.org/10.2147/OTT.S173421>
- 25 Lin, J., Chen, Y., Tang, W.F. et al. (2019) PPARG rs3856806 C>T Polymorphism Increased the Risk of Colorectal Cancer: A Case-Control Study in Eastern Chinese Han Population. *Front. Oncol.* **9**, 63, PMC6389672, <https://doi.org/10.3389/fonc.2019.00063>
- 26 Jiang, J., Tang, W., Liu, C. et al. (2018) Association between ICOS polymorphisms and risk of colorectal cancer: a case-control study involving 2,606 subjects. *Int. J. Clin. Exp. Pathol.* **11**, 2822–2830, PMC6958277
- 27 Lin, J., Xie, Z., Lan, B. et al. (2020) Investigation of Leptin and its receptor (LEPR) for single nucleotide polymorphisms in colorectal cancer: a case-control study involving 2,306 subjects. *Am. J. Transl. Res.* **12**, 3613–3628, PMC7407677, <https://doi.org/10.1200/JCO.2020.38.15.suppl.e16100>
- 28 Higgins, J.P., Thompson, S.G., Deeks, J.J. et al. (2003) Measuring inconsistency in meta-analyses. *BMJ* **327**, 557–560, PMC192859, <https://doi.org/10.1136/bmj.327.7414.557>
- 29 DerSimonian, R. and Laird, N. (1986) Meta-analysis in clinical trials. *Control. Clin. Trials* **7**, 177–188, [https://doi.org/10.1016/0197-2456\(86\)90046-2](https://doi.org/10.1016/0197-2456(86)90046-2)
- 30 Mantel, N. and Haenszel, W. (1959) Statistical aspects of the analysis of data from retrospective studies of disease. *J. Natl. Cancer Inst.* **22**, 719–748
- 31 Tang, W., Qiu, H., Ding, H. et al. (2013) Association between the STK15 F311 polymorphism and cancer susceptibility: a meta-analysis involving 43,626 subjects. *PLoS ONE* **8**, e82790, PMC3862673, <https://doi.org/10.1371/journal.pone.0082790>
- 32 Min, K.T., Kim, J.W., Jeon, Y.J. et al. (2012) Association of the miR-146aC>G, 149C>T, 196a2C>T, and 499A>G polymorphisms with colorectal cancer in the Korean population. *Mol. Carcinog.* **51**, E65–E73, <https://doi.org/10.1002/mc.21849>
- 33 Ma, L., Zhu, L., Gu, D. et al. (2013) A genetic variant in miR-146a modifies colorectal cancer susceptibility in a Chinese population. *Arch. Toxicol.* **87**, 825–833, <https://doi.org/10.1007/s00204-012-1004-2>
- 34 Chayeb, V., Mahjoub, S., Zitouni, H. et al. (2018) Contribution of microRNA-149, microRNA-146a, and microRNA-196a2 SNPs in colorectal cancer risk and clinicopathological features in Tunisia. *Gene* **666**, 100–107, <https://doi.org/10.1016/j.gene.2018.04.084>
- 35 Hezova, R., Kovarikova, A., Bienertova-Vasku, J. et al. (2012) Evaluation of SNPs in miR-196-a2, miR-27a and miR-146a as risk factors of colorectal cancer. *World J. Gastroenterol.* **18**, 2827–2831, PMC3374987, <https://doi.org/10.3748/wjg.v18.i22.2827>
- 36 Vinci, S., Gelmini, S., Mancini, I. et al. (2013) Genetic and epigenetic factors in regulation of microRNA in colorectal cancers. *Methods* **59**, 138–146, <https://doi.org/10.1016/j.ymeth.2012.09.002>
- 37 Kupcinskias, J., Bruzaite, I., Juzenas, S. et al. (2014) Lack of association between miR-27a, miR-146a, miR-196a-2, miR-492 and miR-608 gene polymorphisms and colorectal cancer. *Sci. Rep.* **4**, 5993, PMC4125984, <https://doi.org/10.1038/srep05993>
- 38 Mao, Y., Li, Y., Jing, F. et al. (2014) Association of a genetic variant in microRNA-146a with risk of colorectal cancer: a population-based case-control study. *Tumour Biol.: J. Int. Soc. Oncodevelopmental Biol. Med.* **35**, 6961–6967, <https://doi.org/10.1007/s13277-014-1916-y>

- 39 Hu, X., Li, L., Shang, M. et al. (2014) Association between microRNA genetic variants and susceptibility to colorectal cancer in Chinese population. *Tumour Biol.: J. Int. Soc. Oncodevelopment. Biol. Med.* **35**, 2151–2156, <https://doi.org/10.1007/s13277-013-1285-y>
- 40 Ying, H.Q., Peng, H.X., He, B.S. et al. (2016) MiR-608, pre-miR-124-1 and pre-miR26a-1 polymorphisms modify susceptibility and recurrence-free survival in surgically resected CRC individuals. *Oncotarget* **7**, 75865–75873, PubMed Central PMCID: PMC5342784, <https://doi.org/10.18632/oncotarget.12422>
- 41 Gao, X., Zhu, Z. and Zhang, S. (2018) miR-146a rs2910164 polymorphism and the risk of colorectal cancer in Chinese population. *J. Cancer Res. Therapeutics* **14**, S97–S99, <https://doi.org/10.4103/0973-1482.165864>
- 42 Zhang, S., Jiang, J., Tang, W. et al. (2020) Methylenetetrahydrofolate reductase C677T (Ala>Val, rs1801133 C>T) polymorphism decreases the susceptibility of hepatocellular carcinoma: a meta-analysis involving 12,628 subjects. *Biosci. Rep.* **40**, BSR20194229, PMC7033308, <https://doi.org/10.1042/BSR20194229>
- 43 Yang, J., Zhong, Z., Tang, W. et al. (2019) Leptin rs2167270 G > A (G19A) polymorphism may decrease the risk of cancer: A case-control study and meta-analysis involving 19 989 subjects. *J. Cell. Biochem.* **120**, 10998–11007, PMC6590124, <https://doi.org/10.1002/jcb.28378>
- 44 Lindor, N.M., Larson, M.C., DeRycke, M.S. et al. (2017) Germline miRNA DNA variants and the risk of colorectal cancer by subtype. *Genes Chromosomes Cancer* **56**, 177–184, PMC5245119, <https://doi.org/10.1002/gcc.22420>
- 45 Park, R., Lopes, L. and Saeed, A. (2020) Association Between the Functional miR-146a SNP rs2910164 and Risk of Digestive System Cancer: Updated Meta-analysis. *Anticancer Res.* **40**, 1495–1502, <https://doi.org/10.21873/anticancer.14094>
